# Supplementary material for: A stable and ultrafast K ion storage anode based on phase-engineered MoSe2
Source: Royal Society of Chemistry journal article supplement (doi:10.1039/d1cc00341k), 2021-01-01
Supplement: d1cc00341k1.pdf [file d1cc00341k1.pdf]

## Supporting Information

### A stable and ultrafast K ion storage anode based on phase-engineered MoSe<sub>2</sub>

Lei Liu,<sup>‡</sup> Jie Xu,<sup>‡</sup> Jinqiang Sun, Song He, Ke Wang, Yanan Chen,\* Shuming Dou,  
Zhuzhu Du, Hongfang Du, Wei Ai\* and Wei Huang\*

#### 1. Experimental Section

##### 1.1 Materials synthesis

Typically, nitrogen and phosphorus co-doped hierarchically porous carbon (NPC) was synthesized based on our previous work.<sup>1</sup> For the synthesis of 1T/2H-MoSe<sub>2</sub>, 30 mg NPC was added to 40 mL ethylene glycol (EG) to form a stable dispersion. Next, 218 mg Na<sub>2</sub>MoO<sub>4</sub>·2H<sub>2</sub>O was dissolved in 20 mL EG under ultrasonication, which was then added to the NPC dispersion with vigorous stirring. Subsequently, a red solution prepared by 210 mg Se powder reacting with 10 mL N<sub>2</sub>H<sub>4</sub>·H<sub>2</sub>O was dropwise added to the above-mixed solution. After vigorous stirring for 30 min, the resulting homogeneous dispersion was transferred to a 100 mL autoclave and hydrothermally reacted at 200 °C for 12 h. The as-obtained black precipitate was collected by filtration, washed with deionized water for several times, and finally dried at 80 °C in vacuum oven over night. 1T/2H-MoSe<sub>2</sub> was then obtained after a further annealing at 600 °C for 5 h under argon (heating rate: 5 °C min<sup>-1</sup>). For comparison, 1T-MoSe<sub>2</sub> was prepared under similar conditions but without NPC.

##### 1.2 Material characterizations

SEM and TEM were acquired on a Verios G4 and FEI Talos F200X TEM, respectively. XRD patterns were measured on a Bruker D8 advance diffractometer with Cu K $\alpha$  radiation. XPS was tested using an Axis Supra XPS spectrometer equipped with monochromated Al K $\alpha$ . Raman spectroscopy was collected using a

Horiba LabRAM Evolution spectrometer with an excitation wavelength of 532 nm. N<sub>2</sub> adsorption-desorption analysis was obtained on an ASAP2460 apparatus. TGA was conducted on a Netzsch STA449F3 analyzer under air.

### **1.3 Electrochemical measurements**

The electrochemical properties were tested in half 2032 coin-type cells with metal potassium as the counter electrode and reference electrode. The electrode was prepared by mixing 80 wt% of active materials, 10 wt% of carbon black, and 10 wt% of sodium alginate in deionized water, after which the slurry was coated onto a copper foil and dried overnight at 80 °C under vacuum. Circular electrodes were punched out, and then weighed (0.7-1.0 mg on each electrode). The electrolyte is composed of 3 M KFSI dissolved in dimethyl ether. Electrochemical tests were performed on a NEWARE battery testing system and a CHI 760D electrochemical workstation in the voltage range of 0.01-3.0 V (vs. K<sup>+</sup>/K).

## 2. Supplementary Figures

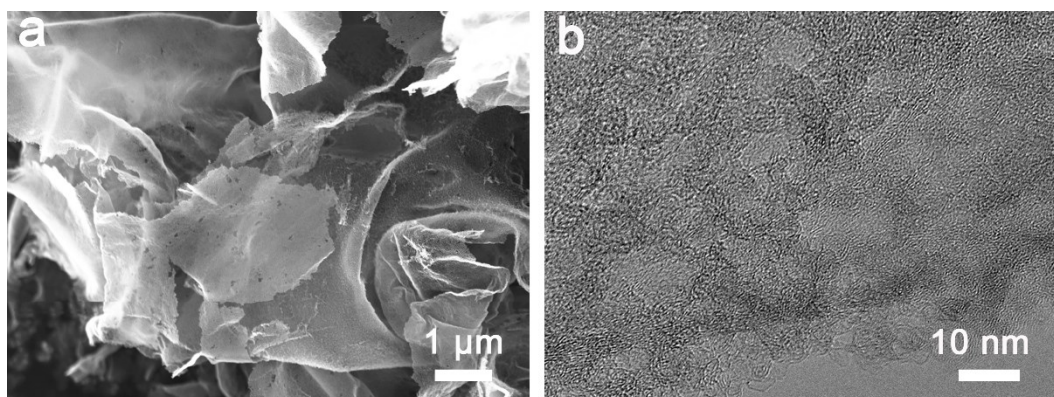

**Fig. S1** (a) SEM and (b) HRTEM image of NPC.

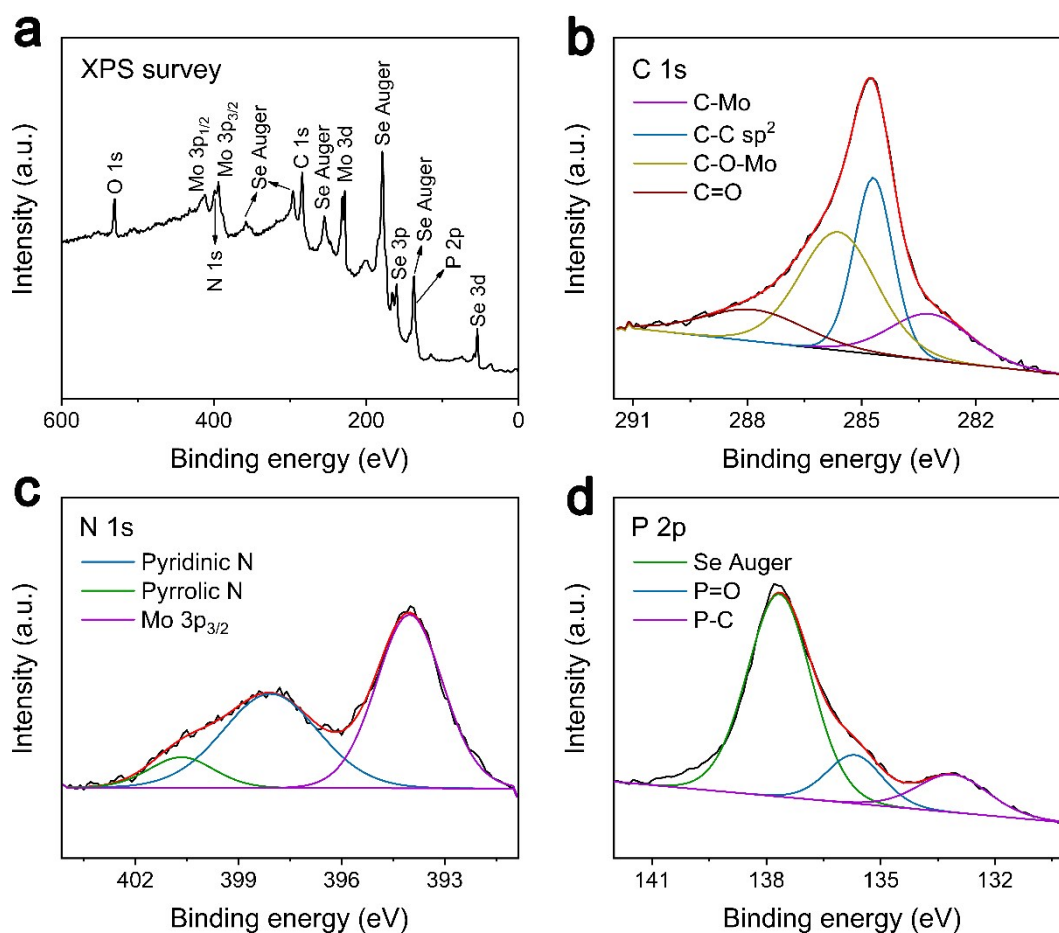

**Fig. S2** (a) XPS survey, high-resolution (b) C 1s, (c) N 1s, and (d) P 2p XPS spectra of 1T/2H-MoSe<sub>2</sub>.

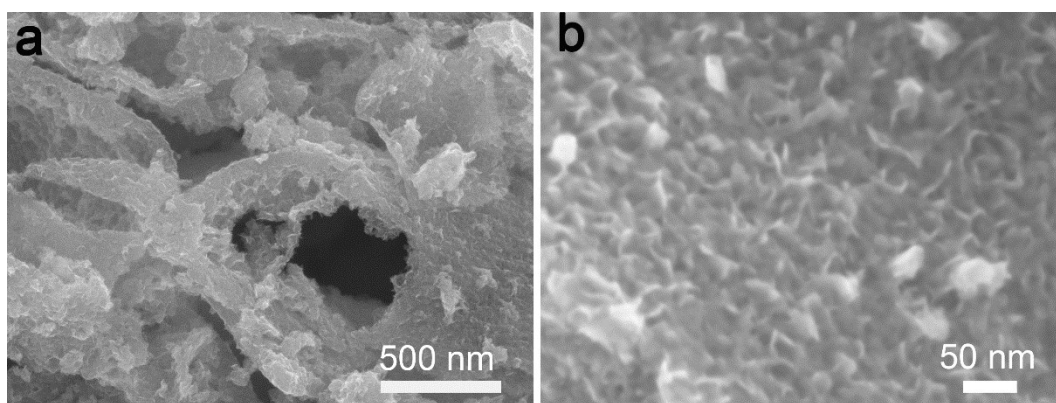

**Fig. S3** (a, b) SEM images of 1T/2H-MoSe<sub>2</sub>.

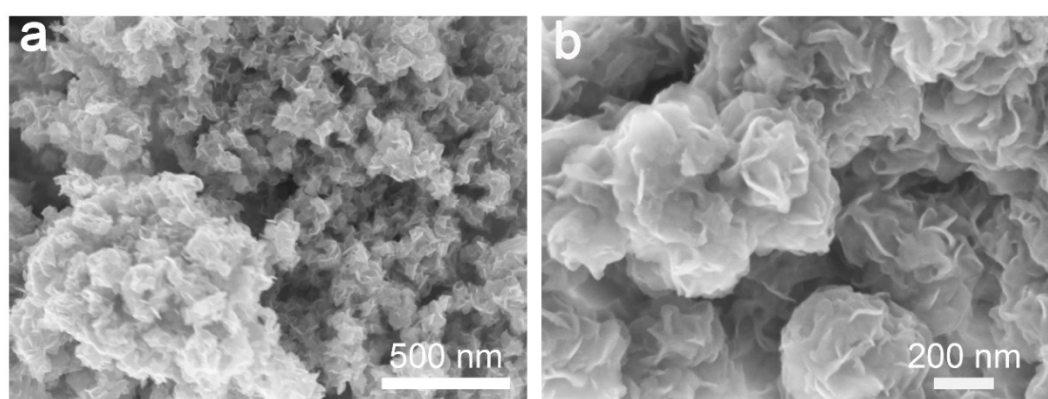

**Fig. S4** (a, b) SEM images of 1T-MoSe<sub>2</sub>.

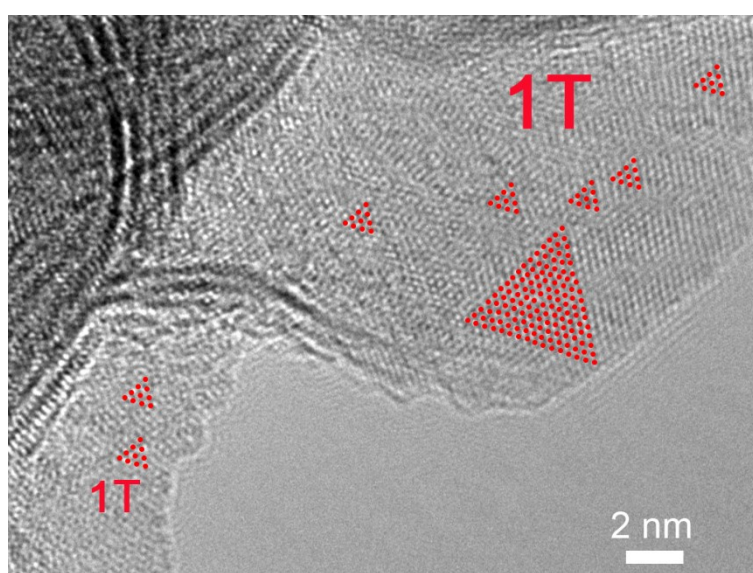

**Fig. S5** HRTEM image of 1T-MoSe<sub>2</sub>.

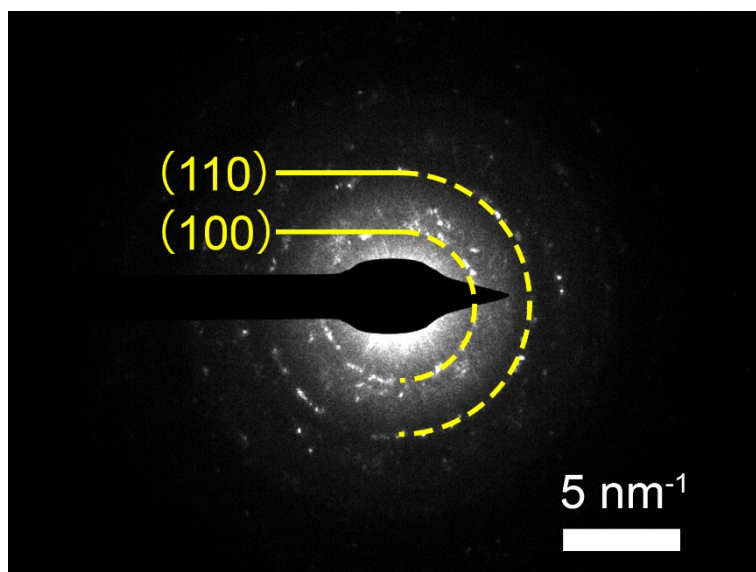

**Fig. S6** SAED pattern of 1T/2H-MoSe<sub>2</sub>.

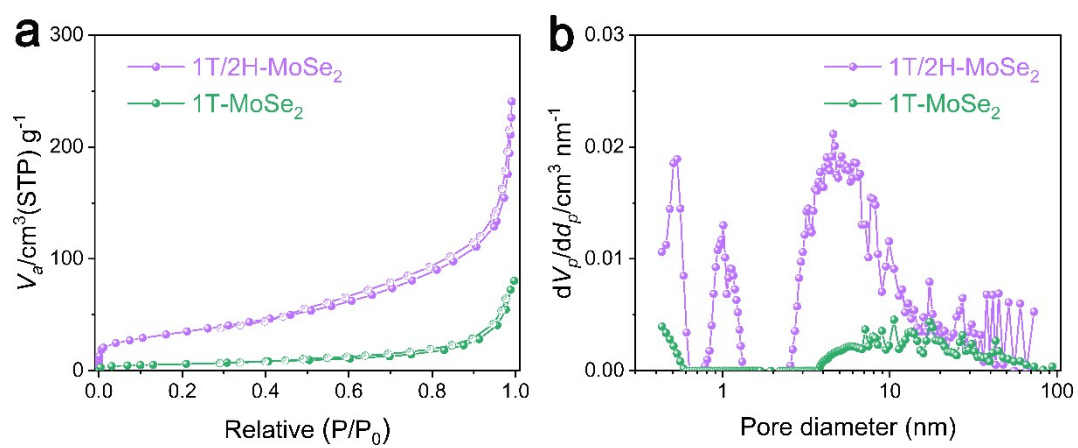

**Fig. S7** (a) N<sub>2</sub> adsorption-desorption isotherms and (b) the corresponding NLDFT pore size distribution plots of 1T/2H-MoSe<sub>2</sub> and 1T-MoSe<sub>2</sub>.

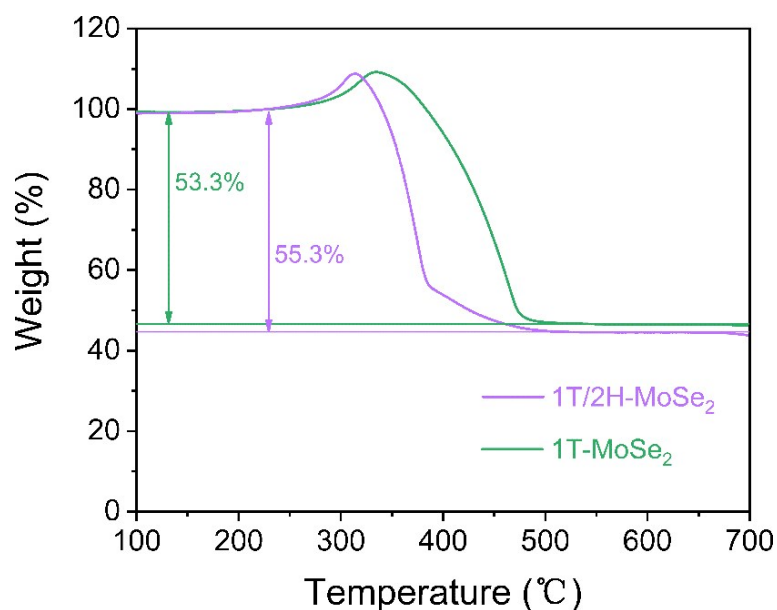

**Fig. S8** TGA curves of 1T/2H-MoSe<sub>2</sub> and 1T-MoSe<sub>2</sub>. In the two samples, the weight gain before 350 °C could be attributed to the oxidation of MoSe<sub>2</sub> to MoO<sub>3</sub> and SeO<sub>2</sub>. In the case of 1T-MoSe<sub>2</sub>, the weight loss resulted from the sublimation of SeO<sub>2</sub>. In comparison, the weight loss of 1T/2H-MoSe<sub>2</sub> is equal to the sum of weight loss of MoSe<sub>2</sub> and NPC. As depicted in the formula below:<sup>2,3</sup>

$$A \times 55.3\% = A \times Y \times 53.3\% + A \times (1 - Y)$$

A: the mass of 1T/2H-MoSe<sub>2</sub>. Y: the loading of MoSe<sub>2</sub> in the 1T/2H-MoSe<sub>2</sub>.

Therefore, the accurate loading of MoSe<sub>2</sub> in the 1T/2H-MoSe<sub>2</sub> is calculated to be 95.7% and the carbon content in the 1T/2H-MoSe<sub>2</sub> sample is calculated to be 4.3%.

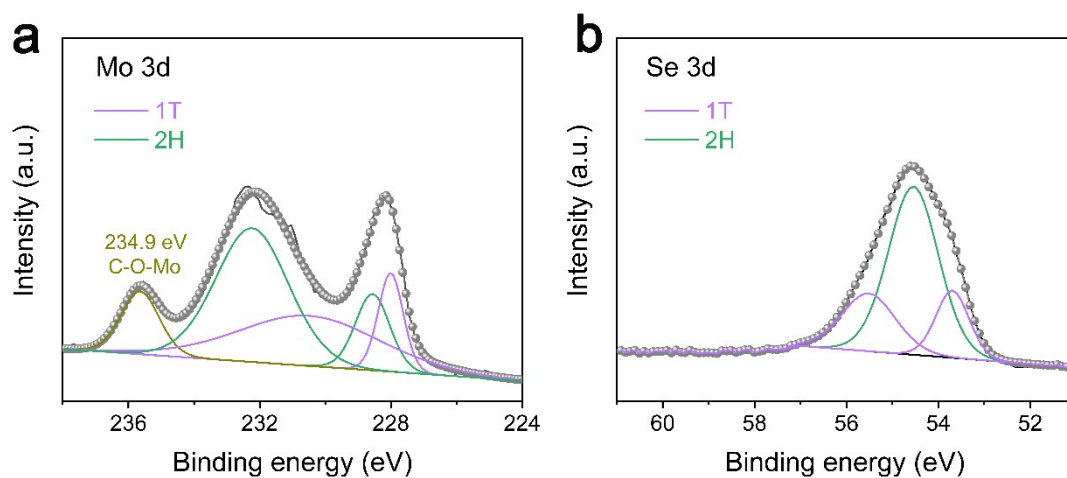

**Fig. S9** High-resolution (a) Mo 3d and (b) Se 3d XPS spectra of the cycled 1T/2H-MoSe<sub>2</sub> electrode.

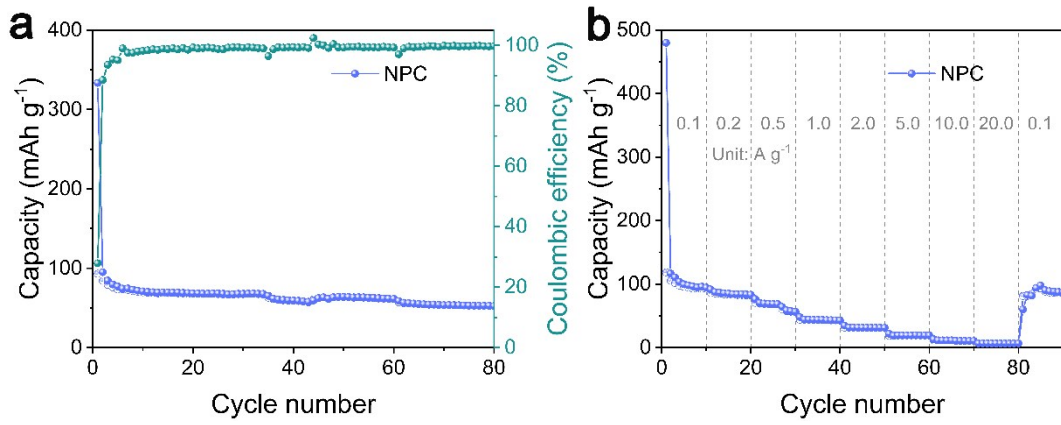

**Fig. S10** (a) Cycling performance (0.2 A g<sup>-1</sup>) and (b) rate capability of NPC.

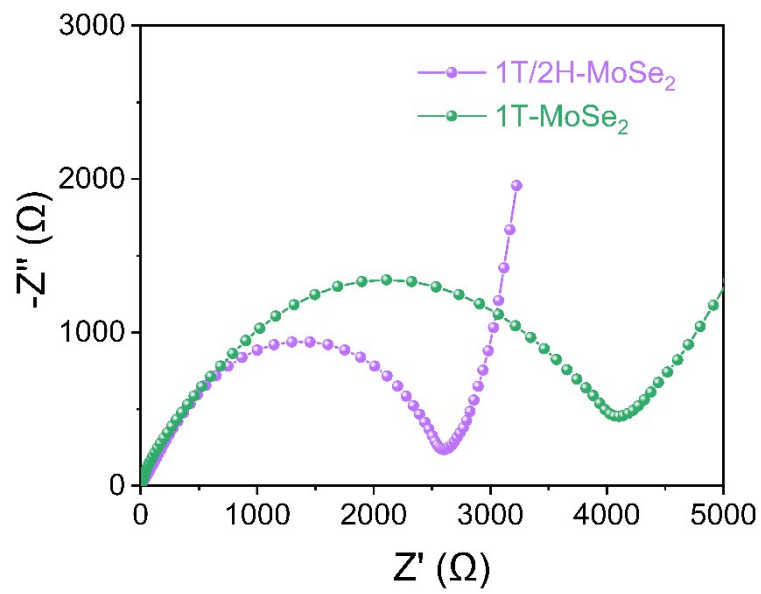

**Fig. S11** Nyquist plots of the 1T/2H-MoSe<sub>2</sub> and 1T-MoSe<sub>2</sub> electrodes after 10 cycles.

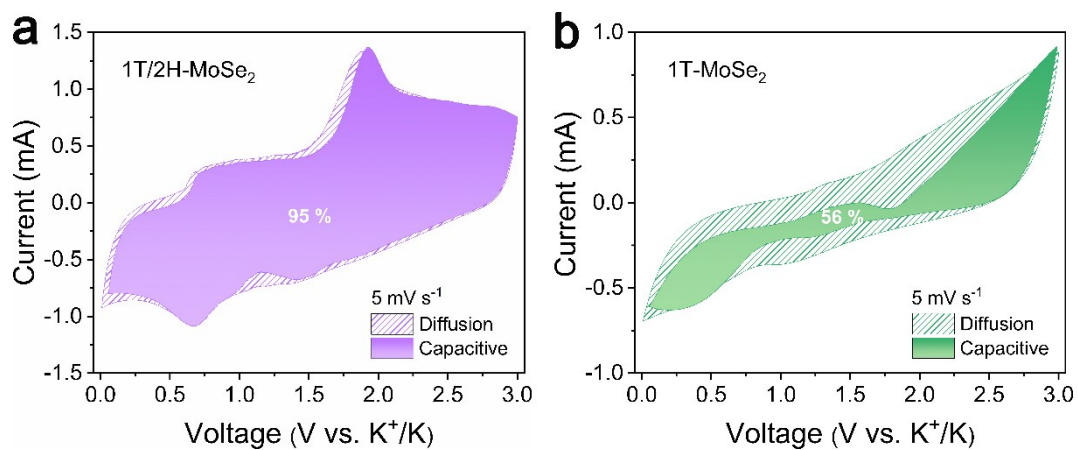

**Fig. S12** The capacitive contribution to the total charge storage of (a) 1T/2H-MoSe<sub>2</sub> and (b) 1T-MoSe<sub>2</sub> electrodes at 5 mV s<sup>-1</sup>.

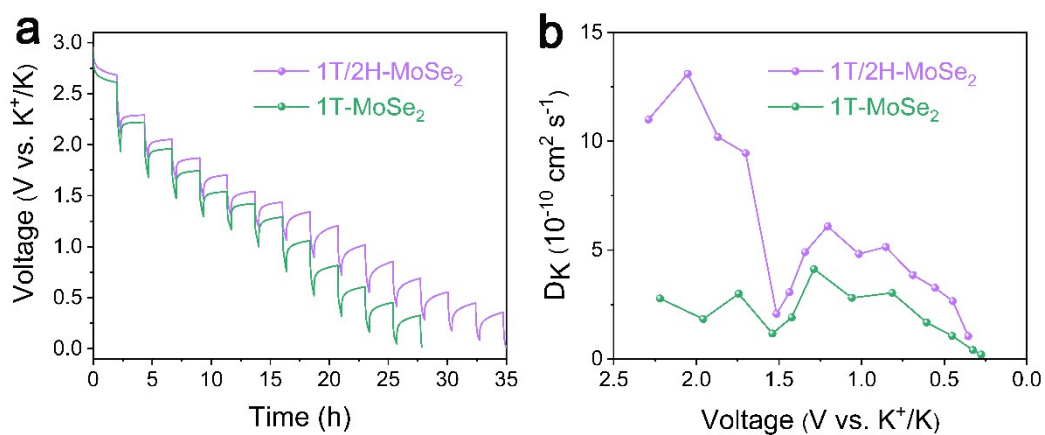

**Fig. S13** (a) GITT profiles of the discharging process and (b) corresponding K ion diffusion coefficients of 1T/2H-MoSe<sub>2</sub> and 1T-MoSe<sub>2</sub>.



### 3. Supplementary Tables

**Table S1.** Comparison of 1T/2H-MoSe<sub>2</sub> with the previously reported TMDs-based anodes for PIBs.

| Samples                                                   | Carbon content (%) | Voltage window (V vs. K <sup>+</sup> /K) | Rate capacity                                          | ICE (%)     | Ref              |
|-----------------------------------------------------------|--------------------|------------------------------------------|--------------------------------------------------------|-------------|------------------|
| <b>1T/2H-MoSe<sub>2</sub></b>                             | <b>4.3</b>         | <b>0.01-3.0</b>                          | <b>211 mAh g<sup>-1</sup> at 20.0 A g<sup>-1</sup></b> | <b>61.9</b> | <b>This work</b> |
| MoSe <sub>2</sub> @PNC-HNTs                               | 36.8               | 0.01-3.0                                 | 79.1 mAh g <sup>-1</sup> at 5.0 A g <sup>-1</sup>      | 27.2        | 4                |
| MoSe <sub>2</sub> /MXene@C                                | —                  | 0.01-3.0                                 | 183 mAh g <sup>-1</sup> at 10.0 A g <sup>-1</sup>      | 54.2        | 5                |
| MoSe <sub>2</sub> @C                                      | —                  | 0.1-2.5                                  | 224 mAh g <sup>-1</sup> at 2.0 A g <sup>-1</sup>       | 63.4        | 6                |
| MoSe <sub>2</sub> @N-C                                    | 8.2                | 0.01-3.0                                 | 178 mAh g <sup>-1</sup> at 2.0 A g <sup>-1</sup>       | 79.9        | 7                |
| MoSe <sub>2</sub> @NC                                     | 7                  | 0.01-3.0                                 | 171 mAh g <sup>-1</sup> at 5.0 A g <sup>-1</sup>       | 60          | 8                |
| N-MoSe <sub>2</sub> @rGO                                  | —                  | 0.01-3.0                                 | 155 mAh g <sup>-1</sup> at 2.0 A g <sup>-1</sup>       | —           | 9                |
| MoS <sub>2</sub> @HPCS                                    | 28.5               | 0.01-3.0                                 | 93.1 mAh g <sup>-1</sup> at 2.0 A g <sup>-1</sup>      | 37.4        | 10               |
| MoS <sub>2</sub> @NC                                      | 25                 | 0.01-2.5                                 | 131 mAh g <sup>-1</sup> at 2.0 A g <sup>-1</sup>       | —           | 11               |
| Co <sub>0.85</sub> Se@C                                   | 49                 | 0.01-2.6                                 | 166 mAh g <sup>-1</sup> at 5.0 A g <sup>-1</sup>       | 50.2        | 12               |
| v-MoSSe@CM                                                | 45.3               | 0.01-3.0                                 | 202.6 mAh g <sup>-1</sup> at 5.0 A g <sup>-1</sup>     | 53.5        | 13               |
| Fe <sub>9</sub> S <sub>10</sub> @MoS <sub>2</sub> @C      | 26.4               | 0.01-3.0                                 | 127 mAh g <sup>-1</sup> at 5.0 A g <sup>-1</sup>       | 71          | 14               |
| CoSeS@C/G                                                 | 7.7                | 0.01-3.0                                 | 195.7 mAh g <sup>-1</sup> at 2.0 A g <sup>-1</sup>     | 48          | 15               |
| MoS <sub>2</sub> @rGO                                     | 12.6               | 0.01-3.0                                 | 178 mAh g <sup>-1</sup> at 0.5 A g <sup>-1</sup>       | —           | 16               |
| Co <sub>9</sub> S <sub>8</sub> /NSC@MoS <sub>2</sub> @NSC | —                  | 0.01-2.6                                 | 163 mAh g <sup>-1</sup> at 3.0 A g <sup>-1</sup>       | 65.9        | 17               |
| V <sub>3</sub> S <sub>4</sub> @C                          | —                  | 0.01 - 3.0                               | 155 mAh g <sup>-1</sup> at 10.0 A g <sup>-1</sup>      | 37          | 18               |
| ZnSe@C                                                    | 20.37              | 0.01-2.5                                 | 205 mAh g <sup>-1</sup> at 0.5 A g <sup>-1</sup>       | 47.78       | 19               |

## References

1. W. Ai, X. Wang, C. Zou, Z. Du, Z. Fan, H. Zhang, P. Chen, T. Yu and W. Huang, *Small*, 2017, **13**, 1602010.
2. X. Yang, Z. Zhang, Y. Fu and Q. Li, *Nanoscale*, 2015, **7**, 10198.
3. F. Niu, J. Yang, N. Wang, D. Zhang, W. Fan, J. Yang and Y. Qian, *Adv. Funct. Mater.*, 2017, **27**, 1700522.
4. B. Li, Y. Liu, Y. Li, S. Jiao, S. Zeng, L. Shi and G. Zhang, *ACS Appl. Mater. Interfaces*, 2020, **12**, 2390.
5. H. Huang, J. Cui, G. Liu, R. Bi and L. Zhang, *ACS Nano*, 2019, **13**, 3448.
6. W. Wang, B. Jiang, C. Qian, F. Lv, J. Feng, J. Zhou, K. Wang, C. Yang, Y. Yang and S. Guo, *Adv. Mater.*, 2018, **30**, 1801812.
7. J. Ge, L. Fan, J. Wang, Q. Zhang, Z. Liu, E. Zhang, Q. Liu, X. Yu and B. Lu, *Adv. Energy Mater.*, 2018, **8**, 1801477.
8. M. Ma, S. Zhang, Y. Yao, H. Wang, H. Huang, R. Xu, J. Wang, X. Zhou, W. Yang, Z. Peng, X. Wu, Y. Hou and Y. Yu, *Adv. Mater.*, 2020, **32**, 2000958.
9. Y. Yi, Z. Sun, C. Li, Z. Tian, C. Lu, Y. Shao, J. Li, J. Sun and Z. Liu, *Adv. Funct. Mater.*, 2019, **30**, 1903878.
10. J. Hu, Y. Xie, X. Zhou and Z. Zhang, *ACS Appl. Mater. Interfaces*, 2020, **12**, 1232.
11. B. Jia, Q. Yu, Y. Zhao, M. Qin, W. Wang, Z. Liu, C. Y. Lao, Y. Liu, H. Wu, Z. Zhang and X. Qu, *Adv. Funct. Mater.*, 2018, **28**, 1803409.
12. C. Atangana Etogo, H. Huang, H. Hong, G. Liu and L. Zhang, *Energy Storage Mater.*, 2020, **24**, 167.
13. Z. Tian, N. Chui, R. Lian, Q. Yang, W. Wang, C. Yang, D. Rao, J. Huang, Y. Zhang, F. Lai, C. Liu and T. Liu, *Energy Storage Mater.*, 2020, **27**, 591.
14. C. Zhang, F. Han, F. Wang, Q. Liu, D. Zhou, F. Zhang, S. Xu, C. Fan, X. Li and J. Liu, *Energy Storage Mater.*, 2020, **24**, 208.
15. C. Wang, B. Zhang, H. Xia, L. Cao, B. Luo, X. Fan, J. Zhang and X. Ou, *Small*, 2020, **16**, 1905853.
16. K. Xie, K. Yuan, X. Li, W. Lu, C. Shen, C. Liang, R. Vajtai, P. Ajayan and B. Wei, *Small*, 2017, **13**.
17. C. Yang, J. Feng, Y. Zhang, Q. Yang, P. Li, T. Arlt, F. Lai, J. Wang, C. Yin, W. Wang, G. Qian, L. Cui, W. Yang, Y. Chen and I. Manke, *Small*, 2019, **15**, 1903720.
18. Y. Liu, Z. Sun, X. Sun, Y. Lin, K. Tan, J. Sun, L. Liang, L. Hou and C. Yuan, *Angew. Chem. Int. Ed.*, 2020, **59**, 2473.
19. J. Chu, W. Wang, Q. Yu, C. Y. Lao, L. Zhang, K. Xi, K. Han, L. Xing, L. Song, M. Wang and Y. Bao, *J. Mater. Chem. A*, 2020, **8**, 779.
